# Supplementary material
Source: PubMed Central journal article supplement (PMC6913203)
Supplement: NIHMS1061632-supplement-1.pdf [file NIHMS1061632-supplement-1.pdf]

## Supplementary Methods

### PubMed Search Strategy

The PubMed search strategy included the following:

- esomeprazole[tiab] OR omeprazole[tiab] OR lansoprazole[tiab] OR dexlansoprazole[tiab] OR rabeprazole[tiab] OR pantoprazole[tiab] OR zegerid[tiab] OR proton pump inhibitor\*[tiab]
- esomeprazole[mesh:noexp] OR omeprazole[mesh:noexp] OR lansoprazole[mesh:noexp] OR dexlansoprazole[mesh:noexp] OR rabeprazole[mesh:noexp] OR pantoprazole[mesh:noexp] OR zegerid[mesh:noexp] OR proton pump inhibitors[mesh:noexp]
- 1 OR 2
- “Clinical Trial” [PT:NoExp] OR “clinical trial, phase i”[pt] OR “clinical trial, phase ii”[pt] OR “clinical trial, phase iii”[pt] OR “clinical trial, phase iv”[pt] OR “controlled clinical trial”[pt] OR “multicenter study”[pt] OR “randomized controlled trial”[pt] OR “Clinical Trials as Topic”[mesh:noexp] OR “clinical trials, phase i as topic”[MeSH Terms:noexp] OR “clinical trials, phase ii as topic”[MeSH Terms:noexp] OR “clinical trials, phase iii as topic”[MeSH Terms:noexp] OR “clinical trials, phase iv as topic”[MeSH Terms:noexp] OR “controlled clinical trials as topic”[MeSH Terms:noexp] OR “randomized controlled trials as topic”[MeSH Terms:noexp] OR “early termination of clinical trials”[MeSH Terms:noexp] OR “multicenter studies as topic”[MeSH Terms:noexp] OR “Double-Blind Method”[Mesh] OR ([randomised(TIAB) OR randomized(TIAB)] AND [trial(TIAB) OR trials(tiab)]) OR ([single(TIAB) OR double(TIAB) OR double-d(TIAB) OR triple(TIAB) OR tripled(TIAB) OR treble(TIAB) OR treble(TIAB)] AND [blind\*(TIAB) OR mask\*(TIAB)]) OR (“4 arm”[tiab] OR “four arm”[tiab])
- 3 AND 5
- pH[tiab]
- 5 AND 7

### Quality of Studies and Recommendations for Gastric pH Measurements

To determine whether intragastric pH data are both reliable and comparative requires a detailed description of how the pH measurements were obtained (eg, from pH electrodes placed in the stomach or pH measurements of intermittently aspirated gastric contents). Antimony electrodes provide slower response times, are more temperature-dependent, show more drift than glass electrodes, and many commercial buffer

solutions used to calibrate glass electrodes are incompatible with antimony electrodes (ie, provide erroneous calibration).<sup>1,2</sup> Gastric electrodes should combine the reference electrode (ie, combination electrodes) because the use of a remote reference is markedly less reliable.<sup>2-4</sup>

Ideally, the methods should describe how and where the electrode was positioned,<sup>5</sup> the sampling rate, the temperature, and the pH used for calibration, preferably 1 and 7 or 1, 4, and 7, whether periodic in vitro stability tests were performed during the recording, whether the electrodes were recalibrated after each test, and what level of drift was deemed acceptable (eg, 0.3 pH units). Meals generally are given during testing and their timing and description also should be given, whether the patients were fully ambulatory, whether smoking was allowed, what type of data collector was used, and which programs were used to analyze the data (see Savarino et al<sup>6</sup>). Errors in the analytical programs used also have been discovered that influenced the output.<sup>7</sup> We only used studies that used combination electrodes and meals with data obtained over a 24-hour period.

### References

- Opekun AR, Graham DY. Antimony electrodes for in vivo pH monitoring. *Dig Dis Sci* 1991;36:1180-1181.
- Opekun AR, Smith JL, Graham DY. Antimony electrodes. Mucosal potential differences and buffer composition adversely affect pH measurements in the stomach. *Dig Dis Sci* 1990; 35:950-955.
- Rovelstad RA, Owen CA Jr, Magath TB. Factors influencing the continuous recording of in situ pH of gastric and duodenal contents. *Gastroenterology* 1952;20:609-624.
- McLauchlan G, Rawlings JM, Lucas ML, et al. Electrodes for 24 hours pH monitoring—a comparative study. *Gut* 1987; 28:935-939.
- McLauchlan G, Fullarton GM, Crean GP, et al. Comparison of gastric body and antral pH: a 24 hour ambulatory study in healthy volunteers. *Gut* 1989;30:573-578.
- Savarino V, Mela GS, Zentilin P, et al. Comparison of 24-h control of gastric acidity by three different dosages of pantoprazole in patients with duodenal ulcer. *Aliment Pharmacol Ther* 1998;12:1241-1247.
- Gardner JD, Young W, Sloan S, et al. The effects of changing temperature correction factors on measures of acidity calculated from gastric and oesophageal pH recordings. *Aliment Pharmacol Ther* 2006;23:629-638.
- Wilder-Smith C, Lind T, Lundin C, et al. Acid control with esomeprazole and lansoprazole: a comparative dose-response study. *Scand J Gastroenterol* 2007;42:157-164.
- Wilder-Smith C, Backlund A, Eckerwall G, et al. Effect of increasing esomeprazole and pantoprazole doses on acid control in patients with symptoms of gastro-oesophageal reflux disease: a randomized, dose-response study. *Clin Drug Investig* 2008;28:333-343.
- Miehlke S, Lobe S, Madisch A, et al. Intragastric acidity during administration of generic omeprazole or esomeprazole - a randomised, two-way crossover study including CYP2C19 genotyping. *Aliment Pharmacol Ther* 2011;33:471-476.

11. Rohss K, Wilder-Smith C, Naucleer E, et al. Esomeprazole 20mg provides more effective intragastric acid control than maintenance-dose rabeprazole, lansoprazole or pantoprazole in healthy volunteers. *Clin Drug Investig* 2004;24:1–7.
12. Norris V, Baisley K, Dunn K, et al. Combined analysis of three crossover clinical pharmacology studies of effects of rabeprazole and esomeprazole on 24-h intragastric pH in healthy volunteers. *Aliment Pharmacol Ther* 2007;25:501–510.
13. Warrington S, Baisley K, Boyce M, et al. Effects of rabeprazole, 20 mg, or esomeprazole, 20 mg, on 24-h intragastric pH and serum gastrin in healthy subjects. *Aliment Pharmacol Ther* 2002;16:1301–1307.
14. Galmiche JP, Bruley DV, Ducrotte P, et al. Tenatoprazole, a novel proton pump inhibitor with a prolonged plasma half-life: effects on intragastric pH and comparison with esomeprazole in healthy volunteers. *Aliment Pharmacol Ther* 2004;19:655–662.
15. Rohss K, Lind T, Wilder-Smith C. Esomeprazole 40 mg provides more effective intragastric acid control than lansoprazole 30 mg, omeprazole 20 mg, pantoprazole 40 mg and rabeprazole 20 mg in patients with gastro-oesophageal reflux symptoms. *Eur J Clin Pharmacol* 2004;60:531–539.
16. Miner P Jr, Katz PO, Chen Y, et al. Gastric acid control with esomeprazole, lansoprazole, omeprazole, pantoprazole, and rabeprazole: a five-way crossover study. *Am J Gastroenterol* 2003;98:2616–2620.
17. Armstrong D, Bair D, James C, et al. Oral esomeprazole vs. intravenous pantoprazole: a comparison of the effect on intragastric pH in healthy subjects. *Aliment Pharmacol Ther* 2003;18:705–711.
18. Johnson DA, Stacy T, Ryan M, et al. A comparison of esomeprazole and lansoprazole for control of intragastric pH in patients with symptoms of gastro-oesophageal reflux disease. *Aliment Pharmacol Ther* 2005;22:129–134.
19. Wilder-Smith CH, Rohss K, Nilsson-Pieschl C, et al. Esomeprazole 40 mg provides improved intragastric acid control as compared with lansoprazole 30 mg and rabeprazole 20 mg in healthy volunteers. *Digestion* 2003;68:184–188.
20. Hunt RH, Armstrong D, James C, et al. Effect on intragastric pH of a PPI with a prolonged plasma half-life: comparison between tenatoprazole and esomeprazole on the duration of acid suppression in healthy male volunteers. *Am J Gastroenterol* 2005;100:1949–1956.
21. Hunt RH, Armstrong D, Yaghoobi M, et al. The pharmacodynamics and pharmacokinetics of S-tenatoprazole-Na 30 mg, 60 mg and 90 mg vs. esomeprazole 40 mg in healthy male subjects. *Aliment Pharmacol Ther* 2010;31:648–657.
22. Morelli G, Chen H, Rossiter G, et al. An open-label, parallel, multiple-dose study comparing the pharmacokinetics and gastric acid suppression of rabeprazole extended-release with esomeprazole 40 mg and rabeprazole delayed-release 20 mg in healthy volunteers. *Aliment Pharmacol Ther* 2011;33:845–854.
23. Spechler SJ, Barker PN, Silberg DG. Clinical trial: intragastric acid control in patients who have Barrett's oesophagus—comparison of once- and twice-daily regimens of esomeprazole and lansoprazole. *Aliment Pharmacol Ther* 2009;30:138–145.
24. Hammer J, Schmidt B. Effect of splitting the dose of esomeprazole on gastric acidity and nocturnal acid breakthrough. *Aliment Pharmacol Ther* 2004;19:1105–1110.
25. Celebi A, Aydin D, Kocaman O, et al. Comparison of the effects of esomeprazole 40 mg, rabeprazole 20 mg, lansoprazole 30 mg, and pantoprazole 40 mg on intragastric pH in extensive metabolizer patients with gastroesophageal reflux disease. *Turk J Gastroenterol* 2016;27:408–414.
26. Rohss K, Hasselgren G, Hedenstrom H. Effect of esomeprazole 40 mg vs omeprazole 40 mg on 24-hour intragastric pH in patients with symptoms of gastroesophageal reflux disease. *Dig Dis Sci* 2002;47:954–958.
27. Miner PB Jr, Tutuian R, Castell DO, et al. Intragastric acidity after switching from 5-day treatment with intravenous pantoprazole 40 mg/d to 5-day treatment with oral esomeprazole 40 mg/d or pantoprazole 40 mg/d: an open-label crossover study in healthy adult volunteers. *Clin Ther* 2006;28:725–733.
28. Hunfeld NG, Touw DJ, Mathot RA, et al. A comparison of the acid-inhibitory effects of esomeprazole and pantoprazole in relation to pharmacokinetics and CYP2C19 polymorphism. *Aliment Pharmacol Ther* 2010;31:150–159.
29. Goldstein JL, Miner PB Jr, Schlesinger PK, et al. Intragastric acid control in non-steroidal anti-inflammatory drug users: comparison of esomeprazole, lansoprazole and pantoprazole. *Aliment Pharmacol Ther* 2006;23:1189–1196.
30. Morgan D, Pandolfino J, Katz PO, et al. Clinical trial: gastric acid suppression in Hispanic adults with symptomatic gastro-oesophageal reflux disease - comparator study of esomeprazole, lansoprazole and pantoprazole. *Aliment Pharmacol Ther* 2010;32:200–208.
31. Tutuian R, Katz PO, Bochenek W, et al. Dose-dependent control of intragastric pH by pantoprazole, 10, 20 or 40 mg, in healthy volunteers. *Aliment Pharmacol Ther* 2002;16:829–836.
32. Miner PB Jr, McKean LA, Gibb RD, et al. Omeprazole-Mg 20.6 mg is superior to lansoprazole 15 mg for control of gastric acid: a comparison of over-the-counter doses of proton pump inhibitors. *Aliment Pharmacol Ther* 2010;31:846–851.
33. Blum RA, Shi H, Karol MD, et al. The comparative effects of lansoprazole, omeprazole, and ranitidine in suppressing gastric acid secretion. *Clin Ther* 1997;19:1013–1023.
34. Baldi F, Morselli-Labate AM, Cappiello R, et al. Daily low-dose versus alternate day full-dose lansoprazole in the maintenance treatment of reflux esophagitis. *Am J Gastroenterol* 2002;97:1357–1364.
35. Dammann HG, von zur MA, Balks HJ, et al. The effects of lansoprazole, 30 or 60 mg daily, on intragastric pH and on endocrine function in healthy volunteers. *Aliment Pharmacol Ther* 1993;7:191–196.
36. Bruley dV, Levy P, Lartigue S, et al. Comparison of lansoprazole with omeprazole on 24-hour intragastric pH, acid secretion and serum gastrin in healthy volunteers. *Aliment Pharmacol Ther* 1994;8:309–314.
37. Harder H, Teyssen S, Stephan F, et al. Effect of 7-day therapy with different doses of the proton pump inhibitor lansoprazole on the intragastric pH in healthy human subjects. *Scand J Gastroenterol* 1999;34:551–561.
38. Bell N, Karol MD, Sachs G, et al. Duration of effect of lansoprazole on gastric pH and acid secretion in normal male volunteers. *Aliment Pharmacol Ther* 2001;15:105–113.
39. Geus WP, Mulder PG, Nicolai JJ, et al. Acid-inhibitory effects of omeprazole and lansoprazole in *Helicobacter pylori*-negative healthy subjects. *Aliment Pharmacol Ther* 1998;12:329–335.
40. Howden CW, Ballard ED, Koch FK, et al. Control of 24-hour intragastric acidity with morning dosing of immediate-release and delayed-release proton pump inhibitors in patients with GERD. *J Clin Gastroenterol* 2009;43:323–326.

41. Florent C, Forestier S. Twenty-four-hour monitoring of intragastric acidity: comparison between lansoprazole 30mg and pantoprazole 40mg. *Eur J Gastroenterol Hepatol* 1997; 9:195–200.
42. Blum RA, Hunt RH, Kidd SL, et al. Dose-response relationship of lansoprazole to gastric acid antisecretory effects. *Aliment Pharmacol Ther* 1998;12:321–327.
43. Huang JQ, Goldwater DR, Thomson AB, et al. Acid suppression in healthy subjects following lansoprazole or pantoprazole. *Aliment Pharmacol Ther* 2002;16:425–433.
44. Bruley dV, Gharib H, Bicheler V, et al. Effect of low-dose rabeprazole and omeprazole on gastric acidity: results of a double blind, randomized, placebo-controlled, three-way crossover study in healthy subjects. *Aliment Pharmacol Ther* 2004;20:899–907.
45. Delchier JC, Benamouzig R, Stanescu L, et al. Twenty-four-hour intragastric acidity and plasma gastrin during 3-month treatment with omeprazole in healthy subjects. *Aliment Pharmacol Ther* 1997;11:747–753.
46. Chowers Y, Atarot T, Pratha VS, et al. The effect of once daily omeprazole and succinic acid (VECAM) vs once daily omeprazole on 24-h intragastric pH. *Neurogastroenterol Motil* 2012; 24:426–429.
47. Williams MP, Sercombe J, Hamilton MI, et al. A placebo-controlled trial to assess the effects of 8 days of dosing with rabeprazole versus omeprazole on 24-h intragastric acidity and plasma gastrin concentrations in young healthy male subjects. *Aliment Pharmacol Ther* 1998;12:1079–1089.
48. Houben GM, Hooi J, Hameeteman W, et al. Twenty-four-hour intragastric acidity: 300 mg ranitidine b.d., 20 mg omeprazole o.m., 40 mg omeprazole o.m. vs. placebo. *Aliment Pharmacol Ther* 1995;9:649–654.
49. Miner PB Jr, Allgood LD, Grender JM. Comparison of gastric pH with omeprazole magnesium 20.6 mg (Prilosec OTC) o.m. famotidine 10 mg (Pepcid AC) b.d. and famotidine 20 mg b.d. over 14 days of treatment. *Aliment Pharmacol Ther* 2007; 25:103–109.
50. Kuo B, Castell DO. Optimal dosing of omeprazole 40 mg daily: effects on gastric and esophageal pH and serum gastrin in healthy controls. *Am J Gastroenterol* 1996; 91:1532–1538.
51. Koop H, Kuly S, Flug M, et al. Intragastric pH and serum gastrin during administration of different doses of pantoprazole in healthy subjects. *Eur J Gastroenterol Hepatol* 1996;8:915–918.
52. Hartmann M, Ehrlich A, Fuder H, et al. Equipotent inhibition of gastric acid secretion by equal doses of oral or intravenous pantoprazole. *Aliment Pharmacol Ther* 1998;12:1027–1032.
53. Geus WP, Mathot RA, Mulder PG, et al. Pharmacodynamics and kinetics of omeprazole MUPS 20 mg and pantoprazole 40 mg during repeated oral administration in *Helicobacter pylori*-negative subjects. *Aliment Pharmacol Ther* 2000;14:1057–1064.
54. Toruner M, Bektas M, Cetinkaya H, et al. The effect of rabeprazole alone or in combination with H<sub>2</sub> receptor blocker on intragastric pH: a pilot study. *Turk J Gastroenterol* 2004; 15:225–228.
55. Rohss K, Wilder-Smith C, Bokelund-Singh S, et al. Acid control cannot be improved with a modified-release formulation of a proton pump inhibitor compared with twice-daily dosing of the conventional formulation. *Dig Dis Sci* 2010;55:3423–3429.
56. Spechler SJ, Sharma P, Traxler B, et al. Gastric and esophageal pH in patients with Barrett's esophagus treated with three esomeprazole dosages: a randomized, double-blind, crossover trial. *Am J Gastroenterol* 2006;101:1964–1971.
57. Miehke S, Madisch A, Kirsch C, et al. Intragastric acidity during treatment with esomeprazole 40 mg twice daily or pantoprazole 40 mg twice daily—a randomized, two-way crossover study. *Aliment Pharmacol Ther* 2005;21:963–967.
58. Orr WC, Harnish MJ. The efficacy of omeprazole twice daily with supplemental H<sub>2</sub> blockade at bedtime in the suppression of nocturnal oesophageal and gastric acidity. *Aliment Pharmacol Ther* 2003;17:1553–1558.
59. Thomson AB, Keelan M, Lastiwka R, et al. Inhibitory potency of twice-a-day omeprazole on gastric acidity is enhanced by eradication of *H. pylori* in duodenal ulcer patients. *Dig Dis Sci* 2003;48:2045–2056.
60. Savarino V, Mela GS, Zentilin P, et al. The effects of omeprazole 20 and 40 mg twice daily on intragastric acidity in duodenal ulcer patients. *Aliment Pharmacol Ther* 1996;10:367–372.
61. Castell D, Bagin R, Goldlust B, et al. Comparison of the effects of immediate-release omeprazole powder for oral suspension and pantoprazole delayed-release tablets on nocturnal acid breakthrough in patients with symptomatic gastro-oesophageal reflux disease. *Aliment Pharmacol Ther* 2005; 21:1467–1474.
62. Khoury RM, Katz PO, Castell DO. Post-prandial ranitidine is superior to post-prandial omeprazole in control of gastric acidity in healthy volunteers. *Aliment Pharmacol Ther* 1999; 13:1211–1214.
63. Katz PO, Hatlebakk JG, Castell DO. Gastric acidity and acid breakthrough with twice-daily omeprazole or lansoprazole. *Aliment Pharmacol Ther* 2000;14:709–714.
64. Katz PO, Castell DO, Chen Y, et al. Intragastric acid suppression and pharmacokinetics of twice-daily esomeprazole: a randomized, three-way crossover study. *Aliment Pharmacol Ther* 2004;20:399–406.
65. Sanders SW, Tolman KG, Greski PA, et al. The effects of lansoprazole, a new H<sup>+</sup>,K<sup>(+)</sup>-ATPase inhibitor, on gastric pH and serum gastrin. *Aliment Pharmacol Ther* 1992;6:359–372.
66. Armbrrecht U, Abucar A, Hameeteman W, et al. Treatment of reflux oesophagitis of moderate and severe grade with ranitidine or pantoprazole—comparison of 24-hour intragastric and oesophageal pH. *Aliment Pharmacol Ther* 1997;11:959–965.
67. Tolman KG, Sanders SW, Buchi KN, et al. The effects of oral doses of lansoprazole and omeprazole on gastric pH. *J Clin Gastroenterol* 1997;24:65–70.
68. Katz PO, Xue S, Castell DO. Control of intragastric pH with omeprazole 20 mg, omeprazole 40 mg and lansoprazole 30 mg. *Aliment Pharmacol Ther* 2001;15:647–652.
69. Chiverton SG, Howden CW, Burget DW, et al. Omeprazole (20 mg) daily given in the morning or evening: a comparison of effects on gastric acidity, and plasma gastrin and omeprazole concentration. *Aliment Pharmacol Ther* 1992;6:103–111.
70. Prichard PJ, Yeomans ND, Mihaly GW, et al. Omeprazole: a study of its inhibition of gastric pH and oral pharmacokinetics after morning or evening dosage. *Gastroenterology* 1985; 88:64–69.
71. Williams MP, Blanshard C, Millson C, et al. A placebo-controlled study to assess the effects of 7-day dosing with 10, 20 and 40 mg rabeprazole on 24-h intragastric acidity and plasma gastrin in healthy male subjects. *Aliment Pharmacol Ther* 2000; 14:691–699.
72. Ohning GV, Barbuti RC, Kovacs TO, et al. Rabeprazole produces rapid, potent, and long-acting inhibition of gastric acid

- secretion in subjects with *Helicobacter pylori* infection. *Aliment Pharmacol Ther* 2000;14:701–708.
73. Lundell L, Hatlebakk J, Galmiche JP, et al. Long-term effect on symptoms and quality of life of maintenance therapy with esomeprazole 20 mg daily: a post hoc analysis of the LOTUS trial. *Curr Med Res Opin* 2015;31:65–73.
  74. Dehn TC, Shepherd HA, Colin-Jones D, et al. Double blind comparison of omeprazole (40 mg od) versus cimetidine (400 mg qd) in the treatment of symptomatic erosive reflux oesophagitis, assessed endoscopically, histologically and by 24 h pH monitoring. *Gut* 1990;31:509–513.
  75. Vasiliadis KV, Viazis N, Vlachogiannakos J, et al. Efficacy of three different dosages of esomeprazole in the long-term management of reflux disease: a prospective, randomized study, using the wireless Bravo pH system. *Am J Gastroenterol* 2010;105:308–313.
  76. Galmiche JP, Zerbib F, Ducrotte P, et al. Decreasing oesophageal acid exposure in patients with GERD: a comparison of rabeprazole and omeprazole. *Aliment Pharmacol Ther* 2001; 15:1343–1350.
  77. Simon B, Muller P, Pascu O, et al. Intra-oesophageal pH profiles and pharmacokinetics of pantoprazole and esomeprazole: a crossover study in patients with gastro-oesophageal reflux disease. *Eur J Gastroenterol Hepatol* 2003;15:791–799.
  78. Janczewska I, Sagar M, Sjostedt S, et al. Comparison of the effect of lansoprazole and omeprazole on intragastric acidity and gastroesophageal reflux in patients with gastroesophageal reflux disease. *Scand J Gastroenterol* 1998;33:1239–1243.
  79. Moawad FJ, Betteridge JD, Boger JA, et al. Reflux episodes detected by impedance in patients on and off esomeprazole: a randomised double-blinded placebo-controlled crossover study. *Aliment Pharmacol Ther* 2013;37:1011–1018.
  80. Vakily M, Zhang W, Wu J, et al. Pharmacokinetics and pharmacodynamics of a known active PPI with a novel dual delayed release technology, dexlansoprazole MR: a combined analysis of randomized controlled clinical trials. *Curr Med Res Opin* 2009;25:627–638.
  81. Kukulka M, Nudurupati S, Perez MC. Pharmacokinetics and pharmacodynamics of an orally disintegrating tablet formulation of dexlansoprazole. *Therap Adv Gastroenterol* 2016; 9:759–769.
  82. Lee RD, Mulford D, Wu J, et al. The effect of time-of-day dosing on the pharmacokinetics and pharmacodynamics of dexlansoprazole MR: evidence for dosing flexibility with a dual delayed release proton pump inhibitor. *Aliment Pharmacol Ther* 2010; 31:1001–1011.
  83. Jenkins H, Sakurai Y, Nishimura A, et al. Randomised clinical trial: safety, tolerability, pharmacokinetics and pharmacodynamics of repeated doses of TAK-438 (vonoprazan), a novel potassium-competitive acid blocker, in healthy male subjects. *Aliment Pharmacol Ther* 2015; 41:636–648.

**Supplementary Table 1.** Studies Reporting pH4time

|              | OE, mg | Study arms, n | Total patients | Weighted mean pH4time | Weighted median pH4 time | References                         |
|--------------|--------|---------------|----------------|-----------------------|--------------------------|------------------------------------|
| Once daily   |        |               |                |                       |                          |                                    |
| Esomeprazole |        |               |                |                       |                          |                                    |
| 20 mg        | 32     | 8             | 280            | 53.4                  | 55.8                     | 8–13                               |
| 40 mg        | 64     | 23            | 880            | 65.9                  | 67.0                     | 8,9,14,15–30                       |
| 80 mg        | 128    | 2             | 72             | 65.8                  | 65.8                     | 8,9                                |
| Lansoprazole |        |               |                |                       |                          |                                    |
| 15 mg        | 13.5   | 6             | 216            | 57.0                  | 43.0                     | 8,11,31–34                         |
| 30 mg        | 27     | 20            | 616            | 54.9                  | 51.1                     | 8,15,16,18,19,23,25,29,30,33,35–43 |
| 60 mg        | 54     | 3             | 65             | 51.5                  | 51.6                     | 8,35,42                            |
| Omeprazole   |        |               |                |                       |                          |                                    |
| 10 mg        | 10     | 1             | 27             | 19.1                  | 19.1                     | 44                                 |
| 20 mg        | 20     | 11            | 245            | 46.9                  | 47.6                     | 6,10,15,16,33,36,39,45–48          |
| 20.6 mg      | 20.6   | 2             | 70             | 53.2                  | 45.7                     | 32,49                              |
| 40 mg        | 40     | 5             | 179            | 61.7                  | 62.0                     | 26,45,48,50                        |
| Pantoprazole |        |               |                |                       |                          |                                    |
| 10 mg        | 2.25   | 1             | 36             | 34.8                  | 34.8                     | 31                                 |
| 20 mg        | 4.5    | 3             | 113            | 37.0                  | 39.5                     | 9,11,31                            |
| 40 mg        | 9      | 16            | 541            | 50.8                  | 52.3                     | 6,9,15,16,25,27–31,40,41,43,51–53  |
| 80 mg        | 18     | 2             | 51             | 39.9                  | 44.9                     | 9,51                               |
| 120 mg       | 27     | 1             | 15             | 37.6                  | 37.6                     | 51                                 |
| Rabeprazole  |        |               |                |                       |                          |                                    |
| 10 mg        | 18     | 3             | 92             | 48.2                  | 48.0                     | 11,12,44                           |
| 20 mg        | 36     | 9             | 215            | 52.2                  | 58.5                     | 12,13,15,16,19,22,25,47,54         |
| Twice daily  |        |               |                |                       |                          |                                    |
| Esomeprazole |        |               |                |                       |                          |                                    |
| 20 mg        | 32     | 2             | 51             | 72.9                  | 72.9                     | 24,55                              |
| 40 mg        | 64     | 5             | 185            | 83.8                  | 83.1                     | 18,23,55,56,57                     |
| Lansoprazole |        |               |                |                       |                          |                                    |
| 15 mg        | 13.5   | 2             | 28             | 60.0                  | 63.0                     | 37,42                              |
| 30 mg        | 27     | 5             | 130            | 66.7                  | 65.5                     | 18,23,37,39,42                     |
| 60 mg        | 54     | 1             | 16             | 83.0                  | 83.0                     | 42                                 |
| Omeprazole   |        |               |                |                       |                          |                                    |
| 20 mg        | 20     | 6             | 85             | 71.4                  | 76.3                     | 39,50,58,60                        |
| 40 mg        | 40     | 1             | 12             | 93.6                  | 93.6                     | 60                                 |
| Pantoprazole |        |               |                |                       |                          |                                    |
| 40 mg        | 9      | 3             | 85             | 67.7                  | 70.0                     | 6,57,61                            |
| 3 times/d    |        |               |                |                       |                          |                                    |
| Esomeprazole |        |               |                |                       |                          |                                    |
| 20 mg        | 32     | 1             | 31             | 80.4                  | 80.4                     | 56                                 |
| 40 mg        | 64     | 1             | 31             | 88.4                  | 88.4                     | 56                                 |
| Lansoprazole |        |               |                |                       |                          |                                    |
| 15 mg        | 13.5   | 1             | 12             | 58.0                  | 58.0                     | 37                                 |
| 30 mg        | 27     | 1             | 16             | 87.0                  | 87.0                     | 42                                 |
| 60 mg        | 54     | 1             | 16             | 77.0                  | 77.0                     | 42                                 |

**Supplementary Table 2.** Studies Excluded Owing to Use of Esophageal Probes, External Electrodes, or in Which Intra-gastric pH Was Obtained by Aspiration

| Types of electrodes used              | Excluded studies |
|---------------------------------------|------------------|
| External electrodes                   | 62–68            |
| Aspirated studies                     | 69–72            |
| Esophageal probes (not intra-gastric) | 73–79            |

**Supplemental Table 3.** Studies Reporting pH4time for Dexlansoprazole and Vonoprazan

|                 | Study arms, n | Total patients | Weighted median pH4time, % | References            |
|-----------------|---------------|----------------|----------------------------|-----------------------|
| Dexlansoprazole |               |                |                            |                       |
| 30 mg           | 1             | 83             | 59                         | <a href="#">80</a>    |
| 60 mg           | 2             | 232            | 70                         | <a href="#">81,82</a> |
| 90 mg           | 1             | 83             | 67                         | <a href="#">80</a>    |
| Vonoprazan      |               |                |                            |                       |
| 10 mg           | 1             | 9              | 60                         | <a href="#">83</a>    |
| 20 mg           | 1             | 9              | 85                         | <a href="#">83</a>    |
| 30 mg           | 1             | 9              | 90                         | <a href="#">83</a>    |
| 40 mg           | 1             | 9              | 93                         | <a href="#">83</a>    |

NOTE. All regimens are once daily and were reported as median pH4time.

**Supplemental Table 4.** Individual Studies Reporting Median and Mean pH6time

|                 | Total patients | Median pH6time, % | References |
|-----------------|----------------|-------------------|------------|
| Once daily      |                |                   |            |
| Lansoprazole    |                |                   |            |
| 15 mg           | 12             | 3                 | 37         |
| 30 mg           | 12             | 4                 | 37         |
| Omeprazole      |                |                   |            |
| 20 mg           | 21             | 11.5              | 46         |
| Twice daily     |                |                   |            |
| Lansoprazole    |                |                   |            |
| 15 mg           | 12             | 6                 | 37         |
| 30 mg           | 12             | 8                 | 37         |
| 3 times/d       |                |                   |            |
| Lansoprazole    |                |                   |            |
| 15 mg           | 12             | 6                 | 37         |
| Mean pH6time, % |                |                   |            |
| Once daily      |                |                   |            |
| Esomeprazole    |                |                   |            |
| 40 mg           | 30             | 20                | 17         |
| 40 mg           | 83             | 36.5              | 30         |
| Lansoprazole    |                |                   |            |
| 15 mg           | 29             | 18                | 33         |
| 30 mg           | 12             | 5                 | 36         |
| 30 mg           | 16             | 17                | 42         |
| 30 mg           | 16             | 20                | 42         |
| 30 mg           | 29             | 22                | 33         |
| 30 mg           | 83             | 28.5              | 30         |
| 60 mg           | 16             | 19                | 42         |
| Omeprazole      |                |                   |            |
| 20 mg           | 12             | 5                 | 36         |
| 20 mg           | 29             | 19                | 33         |
| 20 mg           | 21             | 25.4              | 6          |
| Pantoprazole    |                |                   |            |
| 40 mg           | 83             | 25                | 30         |
| 40 mg           | 20             | 42                | 6          |
| Twice daily     |                |                   |            |
| Lansoprazole    |                |                   |            |
| 15 mg           | 16             | 23                | 42         |
| 30 mg           | 16             | 28                | 42         |
| 60 mg           | 16             | 29                | 42         |
| Omeprazole      |                |                   |            |
| 20 mg           | 12             | 40.7              | 60         |
| 40 mg           | 12             | 43.4              | 60         |
| Pantoprazole    |                |                   |            |
| 40 mg           | 23             | 54.5              | 6          |
| 3 times/d       |                |                   |            |
| Lansoprazole    |                |                   |            |
| 30 mg           | 16             | 45                | 42         |
| 60 mg           | 16             | 33                | 42         |
